# Supplementary material for: Atherogenic Index of Plasma in Non-Alcoholic Fatty Liver Disease: Systematic Review and Meta-Analysis
Source: MDPI journal article supplement (doi:10.3390/biomedicines10092101), 2022-08-27
Supplement: s1 [file s1]

**Table S1.** Summary of the main characteristics of the included studies

| First Author / Country | Year | Study Design          | Study Characteristics                  |                                                                                         |
|------------------------|------|-----------------------|----------------------------------------|-----------------------------------------------------------------------------------------|
| Izadi et al. / Iran    | 2018 | Cross-sectional study | <b>Total Subjects:</b>                 | 83                                                                                      |
|                        |      |                       | <b>Population:</b>                     | Patients with confirmed diagnosis of NAFLD from the university hospital in Jahrom, Iran |
|                        |      |                       | <b>NAFLD:</b>                          | 100%                                                                                    |
|                        |      |                       | <b>Mean age (years):</b>               | 36.71 ± 7.21                                                                            |
|                        |      |                       | <b>Gender (males):</b>                 | 42 (50%)                                                                                |
|                        |      |                       | <b>BMI (kg/m2):</b>                    | 29.41 ± 4.18                                                                            |
|                        |      |                       | <b>NAFLD diagnosis:</b>                | Histological                                                                            |
|                        |      |                       | <b>AIP - Mean ± SD / Median (IQR):</b> | <b>Male:</b> 0.716 ± 0.16<br><b>Female:</b> 0.696 ± 12                                  |
|                        |      |                       | <b>AIP – AUC:</b>                      | -                                                                                       |
| Fadaei et al. / Iran   | 2019 | Case control study    | <b>Total Subjects:</b>                 | 82                                                                                      |
|                        |      |                       | <b>Population:</b>                     | Patients were recruited from Shariati Hospital (Tehran, Iran)                           |
|                        |      |                       | <b>NAFLD:</b>                          | 49 (59.8%)                                                                              |

|                     |      |                     |                                        |                                                                                                                       |
|---------------------|------|---------------------|----------------------------------------|-----------------------------------------------------------------------------------------------------------------------|
|                     |      |                     | <b>Mean age (years):</b>               | <b>Control:</b> 50<br><b>NAFLD:</b> 51                                                                                |
|                     |      |                     | <b>Gender (males):</b>                 | 41                                                                                                                    |
|                     |      |                     | <b>BMI:</b>                            | <b>Control:</b> 25.0 ± 0.6<br><b>NAFLD:</b> 28.0 ± 0.4                                                                |
|                     |      |                     | <b>NAFLD diagnosis:</b>                | Ultrasonography                                                                                                       |
|                     |      |                     | <b>AIP - Mean ± SD / Median (IQR):</b> | <b>Control:</b> 0.374 ± 0.032<br><b>NAFLD:</b> 0.498 ± 0.026                                                          |
|                     |      |                     | <b>AIP – AUC:</b>                      | -                                                                                                                     |
| Wang et al. / China | 2018 | Observational study | <b>Total Subjects:</b>                 | 538                                                                                                                   |
|                     |      |                     | <b>Population:</b>                     | Data was collected at local health stations by trained medical staff in the Shandong Province, China                  |
|                     |      |                     | <b>NAFLD:</b>                          | 392 (73%)                                                                                                             |
|                     |      |                     | <b>Mean age (years):</b>               | <b>Low AIP level:</b> 42.18 ± 11.59 <b>Intermediate AIP level:</b> 42.2 ± 11.2<br><b>High AIP level:</b> 41.7 ± 11.5  |
|                     |      |                     | <b>Gender (males):</b>                 | 281 (52.23%)                                                                                                          |
|                     |      |                     | <b>BMI:</b>                            | <b>Low AIP level:</b> 30.48 ± 2.16 <b>Intermediate AIP level:</b> 30.63 ± 2.03<br><b>High AIP level:</b> 30.97 ± 2.21 |

|                     |      |                       |                                                       |                                                                                                                                 |
|---------------------|------|-----------------------|-------------------------------------------------------|---------------------------------------------------------------------------------------------------------------------------------|
|                     |      |                       | <b>NAFLD diagnosis:</b>                               | Ultrasonography                                                                                                                 |
|                     |      |                       | <b>AIP - Mean <math>\pm</math> SD / Median (IQR):</b> | <b>Low AIP level:</b> $-0.11 \pm 0.15$ <b>Intermediate AIP level:</b> $0.16 \pm 0.03$<br><b>High AIP level:</b> $0.48 \pm 0.28$ |
|                     |      |                       | <b>AIP – AUC:</b>                                     | <b>Total:</b> 0.718 (0.670–0.766)<br><b>Male:</b> 0.775 (0.709-0.841)<br><b>Female:</b> 0.633 (0.561-0.706)                     |
| Izadi et al. / Iran | 2019 | Cross-sectional study | <b>Total Subjects:</b>                                | 83                                                                                                                              |
|                     |      |                       | <b>Population:</b>                                    | Patients from Jahrom University of Medical Science                                                                              |
|                     |      |                       | <b>NAFLD:</b>                                         | 100%                                                                                                                            |
|                     |      |                       | <b>Mean age (years):</b>                              | $36.71 \pm 7.21$                                                                                                                |
|                     |      |                       | <b>Gender (males):</b>                                | 42 (50.6%)                                                                                                                      |
|                     |      |                       | <b>BMI:</b>                                           | $29.41 \pm 4.18$                                                                                                                |
|                     |      |                       | <b>NAFLD diagnosis:</b>                               | Ultrasonography, histopathological                                                                                              |
|                     |      |                       | <b>AIP - Mean <math>\pm</math> SD / Median (IQR):</b> | $0.697 \pm 0.153$                                                                                                               |
|                     |      |                       | <b>AIP – AUC:</b>                                     | -                                                                                                                               |
| Liu et al. / China  | 2020 | Observational Study   | <b>Total Subjects:</b>                                | 250                                                                                                                             |

|                     |      |                       |                                        |                                                                                                                                                                                                                                             |
|---------------------|------|-----------------------|----------------------------------------|---------------------------------------------------------------------------------------------------------------------------------------------------------------------------------------------------------------------------------------------|
|                     |      |                       | <b>Population:</b>                     | Patients with T2DM who visited and were followed up at the Endocrinology Department of Affiliated Hospital 2 of Nantong University and 50 healthy controls from the Department of Physical Examination Center between Apr 2017 and Oct 2018 |
|                     |      |                       | <b>NAFLD:</b>                          | 89 (35.6%)                                                                                                                                                                                                                                  |
|                     |      |                       | <b>Mean age (years):</b>               | <b>Controls:</b> 35.3 ± 10.9<br><b>Total T2DM:</b> 52.4 ± 10.7                                                                                                                                                                              |
|                     |      |                       | <b>Gender (males):</b>                 | <b>Controls:</b> 19.6%<br><b>T2DM Total:</b> 60.5%                                                                                                                                                                                          |
|                     |      |                       | <b>BMI:</b>                            | <b>Controls:</b> 22.5 ± 2.7<br><b>T2DM Total:</b> 25.8±3.6                                                                                                                                                                                  |
|                     |      |                       | <b>NAFLD diagnosis:</b>                | Hepatic steatosis on ultrasound                                                                                                                                                                                                             |
|                     |      |                       | <b>AIP - Mean ± SD / Median (IQR):</b> | <b>Controls:</b> -0.13±0.30<br><b>Total T2DM:</b> 0.23±0.25                                                                                                                                                                                 |
|                     |      |                       | <b>AIP – AUC:</b>                      | -                                                                                                                                                                                                                                           |
| Dong et al. / China | 2020 | Cross-Sectional Study | <b>Total Subjects:</b>                 | 78,304                                                                                                                                                                                                                                      |
|                     |      |                       | <b>Population:</b>                     | Chinese population from First Affiliated Hospital of Wenzhou Medical University between Jan 2010 - Dec 2014                                                                                                                                 |

|                                 |      |                     |                                        |                                                                                                                                                                                      |
|---------------------------------|------|---------------------|----------------------------------------|--------------------------------------------------------------------------------------------------------------------------------------------------------------------------------------|
|                                 |      |                     | <b>NAFLD:</b>                          | <b>Development Group:</b> NAFLD: 8904 (6.16%)<br><b>Validation Group:</b> NAFLD: 3689 (6.35%)                                                                                        |
|                                 |      |                     | <b>Mean age (years):</b>               | <b>Development Group:</b> <u>NAFLD</u> : 49.4±13.5 <u>Non-NAFLD</u> : 43.7 ± 15.6 <b>Validation Group:</b> <u>NAFLD</u> : 49.7 ± 13.8 <u>Non-NAFLD</u> : 43.6 ± 15.6                 |
|                                 |      |                     | <b>Gender (males):</b>                 | 45,096 (57.6%)                                                                                                                                                                       |
|                                 |      |                     | <b>BMI:</b>                            | <b>Development Group:</b> <u>NAFLD</u> : 23.4±1.2 <u>Non-NAFLD</u> : 21.3±2.1<br><b>Validation Group:</b> <u>NAFLD</u> : 23.4±1.2 <u>Non-NAFLD</u> : 21.3±2.0                        |
|                                 |      |                     | <b>NAFLD diagnosis:</b>                | Ultrasonography                                                                                                                                                                      |
|                                 |      |                     | <b>AIP - Mean ± SD / Median (IQR):</b> | <b>Development Group:</b> <u>NAFLD</u> : 0.2 (0.0,0.4) <u>Non-NAFLD</u> : -0.1 (- 0.3,0.0) <b>Validation Group:</b> <u>NAFLD</u> : 0.2 (0.0,0.4) <u>Non-NAFLD</u> : -0.1 (- 0.3,0.0) |
|                                 |      |                     | <b>AIP – AUC:</b>                      | <b>Development:</b> 0.803 (0.798–0.808) <b>Validation:</b> 0.802 90.795–0.810)                                                                                                       |
| Turecký et al. / Czech Republic | 2021 | Observational Study | <b>Total Subjects:</b>                 | 90                                                                                                                                                                                   |
|                                 |      |                     | <b>Population:</b>                     | <b>Control:</b> 26 people<br><b>NAFLD:</b> 64 patients                                                                                                                               |
|                                 |      |                     | <b>NAFLD:</b>                          | 64 (71.1%)                                                                                                                                                                           |
|                                 |      |                     | <b>Mean age (years):</b>               | <b>Control:</b> 35.6                                                                                                                                                                 |

|                    |      |                       |                                                       |                                                                           |
|--------------------|------|-----------------------|-------------------------------------------------------|---------------------------------------------------------------------------|
|                    |      |                       |                                                       | <b>NAFLD:</b> 55.2                                                        |
|                    |      |                       | <b>Gender (males):</b>                                | <b>Control:</b> 43 (42.3%)<br><b>NAFLD:</b> 32 (50%)                      |
|                    |      |                       | <b>BMI:</b>                                           | -                                                                         |
|                    |      |                       | <b>NAFLD diagnosis:</b>                               | Ultrasound and positive fatty liver index                                 |
|                    |      |                       | <b>AIP - Mean <math>\pm</math> SD / Median (IQR):</b> | <b>Control:</b> -0.191 $\pm$ 0.04<br><b>NAFLD:</b> 0.157 $\pm$ 0.04       |
|                    |      |                       | <b>AIP – AUC:</b>                                     | -                                                                         |
| Xie et al. / China | 2021 | Cross-Sectional Study | Total Subjects:                                       | 1748                                                                      |
|                    |      |                       | <b>Population:</b>                                    | Recruited in physical examination center of Suzhou.                       |
|                    |      |                       | <b>NAFLD:</b>                                         | 526 (30.09%)                                                              |
|                    |      |                       | <b>Mean age (years):</b>                              | <b>Fatty liver (FL) (+)</b> = 46 (38, 57),<br><b>FL (-)</b> = 43 (36, 58) |
|                    |      |                       | <b>Gender (males):</b>                                | <b>FL (+)</b> = 464 (26.5%),<br><b>FL (-)</b> = 689 (39.42%)              |
|                    |      |                       | <b>BMI:</b>                                           | <b>FL (+)</b> = 26.5 (24.6, 28.5),<br><b>FL (-)</b> = 22.7 (20.5, 24.5)   |
|                    |      |                       | <b>NAFLD diagnosis:</b>                               | Ultrasonography                                                           |

|  |  |  |                                            |                                                                                                                                                                                                       |
|--|--|--|--------------------------------------------|-------------------------------------------------------------------------------------------------------------------------------------------------------------------------------------------------------|
|  |  |  | <b>AIP - Mean ± SD / Median (IQR):</b>     | <b>FL (+)</b> = 0.59 (0.13, 0.98),<br><b>FL (-)</b> = -0.18 (-0.56, 0.22)                                                                                                                             |
|  |  |  | <b>AIP - Mean ± SD / Median (IQR) M:F:</b> | <b>Male:</b> <b><u>FL (+):</u></b> 0.63 (0.16, 0.99) <b><u>FL (-):</u></b> -0.03 (-0.037, 0.039)<br><b>Female:</b> <b><u>FL (+):</u></b> 0.33 (- 0.01, 0.72) <b><u>FL (-):</u></b> - 0.42 (- 0.76, 0) |
|  |  |  | <b>AIP – AUC:</b>                          | <b>Total:</b> 0.804 (0.783-0.825)<br><b>Males:</b> 0.759 (0.731, 0.787)<br><b>Females:</b> 0.828 (0.782, 0.874)                                                                                       |

**Table S2.** QUADAS-2 tool used to evaluate the methodological quality of first four included studies

| Criteria                                                                                            | Izadi 2018 | Fadaei 2019 | Wang 2018 | Izadi 2020 |
|-----------------------------------------------------------------------------------------------------|------------|-------------|-----------|------------|
| <b>A. Risk of bias</b>                                                                              |            |             |           |            |
| Was a consecutive or random sample of patients enrolled?                                            | Unclear    | Unclear     | Unclear   | Unclear    |
| Was a case-control design avoided?                                                                  | Yes        | No          | Yes       | Yes        |
| Did the study avoid inappropriate exclusions?                                                       | Yes        | Yes         | Yes       | Yes        |
| Risk of bias assessment                                                                             | Low risk   | High risk   | Low risk  | Low risk   |
| <b>B. Applicability</b>                                                                             | Low risk   | Low risk    | Low risk  | Low risk   |
| <b>A. Risk of bias</b>                                                                              |            |             |           |            |
| Were the index test results interpreted without knowledge of the results of the reference standard? | Yes        | Yes         | Yes       | Yes        |
| If a threshold was used, was it pre-specified?                                                      | NA         | NA          | NA        | NA         |
| Risk of bias assessment                                                                             | Low risk   | Low risk    | Low risk  | Low risk   |
| <b>B. Applicability</b>                                                                             | Low risk   | Low risk    | Low risk  | Low risk   |
| <b>A. Risk of bias</b>                                                                              |            |             |           |            |
| Is the reference standard likely to correctly classify the target condition?                        | Yes        | No          | No        | Yes        |
| Were the reference standard results interpreted without knowledge of the results of the index test? | Yes        | Yes         | Yes       | Yes        |
| Risk of bias assessment                                                                             | Low risk   | Low risk    | Low risk  | Low risk   |
| <b>B. Applicability</b>                                                                             | Low risk   | Low risk    | Low risk  | Low risk   |
| <b>A. Risk of bias</b>                                                                              |            |             |           |            |
| Was there an appropriate interval between index test(s) and reference standard?                     | Unclear    | Unclear     | Unclear   | Unclear    |
| Did all patients receive a reference standard?                                                      | Yes        | Yes         | Yes       | Yes        |
| Did patients receive the same reference standard?                                                   | Yes        | Yes         | Yes       | Yes        |
| Were all patients included in the analysis?                                                         | Yes        | Yes         | Yes       | Yes        |
| Risk of bias assessment                                                                             | Low risk   | Low risk    | Low risk  | Low risk   |



**Table S2 (Cont'd).** QUADAS-2 tool used to evaluate the methodological quality of last four included studies

| Criteria                                                                                            | Liu 2020  | Dong 2020 | Turecký 2021 | Xie 2021  |
|-----------------------------------------------------------------------------------------------------|-----------|-----------|--------------|-----------|
| <b>A. Risk of bias</b>                                                                              |           |           |              |           |
| Was a consecutive or random sample of patients enrolled?                                            | Unclear   | Unclear   | Unclear      | Unclear   |
| Was a case-control design avoided?                                                                  | No        | No        | No           | No        |
| Did the study avoid inappropriate exclusions?                                                       | Yes       | Yes       | Yes          | Yes       |
| Risk of bias assessment                                                                             | High risk | High risk | High risk    | High risk |
| <b>B. Applicability</b>                                                                             | Low risk  | Low risk  | Low risk     | Low risk  |
| <b>A. Risk of bias</b>                                                                              |           |           |              |           |
| Were the index test results interpreted without knowledge of the results of the reference standard? | Yes       | Yes       | Yes          | Yes       |
| If a threshold was used, was it pre-specified?                                                      | NA        | NA        | NA           | NA        |
| Risk of bias assessment                                                                             | Low risk  | Low risk  | Low risk     | Low risk  |
| <b>B. Applicability</b>                                                                             | Low risk  | Low risk  | Low risk     | Low risk  |
| <b>A. Risk of bias</b>                                                                              |           |           |              |           |
| Is the reference standard likely to correctly classify the target condition?                        | No        | No        | No           | No        |
| Were the reference standard results interpreted without knowledge of the results of the index test? | Yes       | Yes       | Yes          | Yes       |
| Risk of bias assessment                                                                             | Low risk  | Low risk  | Low risk     | Low risk  |
| <b>B. Applicability</b>                                                                             | Low risk  | Low risk  | Low risk     | Low risk  |
| <b>A. Risk of bias</b>                                                                              |           |           |              |           |
| Was there an appropriate interval between index test(s) and reference standard?                     | Unclear   | Unclear   | Unclear      | Unclear   |
| Did all patients receive a reference standard?                                                      | Yes       | Yes       | Yes          | Yes       |
| Did patients receive the same reference standard?                                                   | Yes       | Yes       | Yes          | Yes       |
| Were all patients included in the analysis?                                                         | Yes       | Yes       | Yes          | Yes       |
| Risk of bias assessment                                                                             | Low risk  | Low risk  | Low risk     | Low risk  |
